# Supplementary material
Source: Springer Nature journal article supplement (https://www.springermedizin.de/resource/supplementary/12874_2009_343_MOESM2_ESM.pdf/9434270)
Supplement: MOESM2 [file 9434270]

**Expressed interest in study (352)**

**Unable to re-contact (n=36)**

**Not Eligible (n=145)**

Does not meet risk criteria (72)

Too active (49)

Medical exclusion (17)

Unknown (7)

**Eligible (n=171) (41%)**

**Declined participation (n=72)**

**Completed Baseline Activity Evaluation [n=100, 50  
High Risk (HR), 50 Survivors(S)]**

**Too active (n=37, 20 HR, 17S)**

**Declined/Lost to follow-up (n=5)**

**Eligible for Physical Activity Intervention (n=58, 29  
HR, 29 S)**

**Intervention**

**(n=29, 15 HR, 14 S)**

**Control**

**(n=29, 13 HR, 16 S)**

**Completed Study  
(n=43, 21 HR, 22 Survivors)**
